# Supplementary material for: Sediment microbial community structure associated to different ecological types of mangroves in Celestún, a coastal lagoon in the Yucatan Peninsula, Mexico
Source: PeerJ. 2023 Feb 8;11:e14587. doi: 10.7717/peerj.14587 (PMC9921989; doi:10.7717/peerj.14587)
Supplement: Supplemental Information 2 — Data from basin, dwarf and fringe mangroves from Celestún, Yucatán, Mexico [file peerj-11-14587-s002.xlsx]

## Sheet: fisicoquimicos_estadistico.txt
sample	Mangroveforest	Type	SalinityInterstitial	TemperatureInterstitial	pHinterstitial	redoxpotencialinterstitial	salinitysuperficialwater	Temperaturesuperficialwater	pHsuperficialwater	redoxpotentialsuperficialwater	density	orgmatter	totalcarb	totalnitro	Totalphosphorous
TM1.1	Basin	BAg	46	28	6.35	160	5	28.1	7.69	246	0.31	26.04	53.69	1.85	0.0604
TM1.2	Basin	BAg	40	28.4	6.75	256	5	28.3	7.61	169	0.22	27	72.71	2.37	0.0009
TM1.3	Basin	BAg	33	28.4	7.3	238	2	27.7	7.6	256	NA	NA	NA	NA	NA
TM1.4	Basin	BAg	20	28.8	7.8	223	NA	NA	NA	NA	NA	NA	NA	NA	NA
TM2.1	Dwarf	DRm	53	30.7	6.65	208	3	28.1	7.51	215	0.11	19.6	41	0.972	0.0689
TM2.2	Dwarf	DRm	55	31.3	6.79	234	3	28.4	7.17	227	0.21	23.62	45.7	1.267	0.0593
TM2.3	Dwarf	DRm	55	31.6	6.73	250	4	29.9	7.81	120	NA	NA	NA	NA	NA
TM2.4	Dwarf	DRm	54	29.6	6.76	266	NA	NA	NA	187.3	NA	NA	NA	NA	NA
TM3.1	Basin	BRm	45	29.1	6.6	256	5	26.5	6.9	200	0.19	29.74	58.13	1.897	0.0521
TM3.2	Basin	BRm	50	28.4	6.65	257	5	27.1	7.4	236	0.16	31.17	64.16	2.143	0.0691
TM3.4	Basin	BRm	53	28.5	6.83	249	5	28.2	7.64	236	NA	NA	NA	NA	NA
TM3.3	Basin	BRm	51	28.3	6.74	254	NA	NA	NA	NA	NA	NA	NA	NA	NA
TM4.1	Basin	BRmAg	50	28.2	6.39	222	15	28.6	7.86	254	0.23	27	59.62	2.113	0.0378
TM4.2	Basin	BRmAg	51	27.8	6.49	239	12	28.7	7.73	219	0.16	28.15	65.65	1.709	0.0005
TM4.3	Basin	BRmAg	48	28.2	6.54	249	7	28	7.78	245	NA	NA	NA	NA	NA
TM4.4	Basin	BRmAg	50	27.8	6.52	247	NA	NA	NA	NA	NA	NA	NA	NA	NA
TM5.1	Fringe	FRm	30	26.8	6.62	237	10	27.1	7.72	250	0.31	25.15	51.11	1.269	0.0513
TM5.2	Fringe	FRm	31	26.8	6.75	249	13	29.1	6.66	231	0.24	35.99	59.03	1.91	0.0256
TM5.3	Fringe	FRm	32	26.6	6.8	247	8	26.8	7.26	261	NA	NA	NA	NA	NA
TM5.4	Fringe	FRm	28	26.7	6.69	248	NA	NA	NA	NA	NA	NA	NA	NA	NA
